# Supplementary material
Source: HighWire-hosted journal article supplement (https://bmjopenquality.bmj.com/content/5/1/u209855.w3501)
Supplement: inline-supplementary-material-3 [file inline-supplementary-material-3.xls]

## Sheet: Run Chart
RUN CHART
			Do not touch this column. It calculates automatically
Measurement Points	Numerator (top number in the fraction)	Denominator (bottom number in the fraction)	AP
Baseline (Sept-Dec 2015)	7	36	0.194444
Post Intervention 1 (Dec 2015)	14	15	0.933333
Post Intervention 2 (March 2016)	12	15	0.8
Measurement Points	Numerator (top number in the fraction)	Denominator (bottom number in the fraction)	Axillary
Baseline (Sept-Dec 2015)	11	19	0.578947
Post Intervention 1 (Dec 2015)	12	13	0.923077
Post Intervention 2 (March 2016)	14	15	0.933333
